# Supplementary material for: Surface Lewis acid-promoted copper-based nanocatalysts for highly efficient and chemoselective hydrogenation of citral to unsaturated allylic alcohols
Source: Royal Society of Chemistry journal article supplement (doi:10.1039/c5cy01084e), 2015-11-12
Supplement: c5cy01084e1.pdf [file c5cy01084e1.pdf]

## Supporting Information

### Surface Lewis acid-promoted copper-based nanocatalysts for highly efficient and chemoselective hydrogenation of citral to unsaturated allylic alcohols

Wei Li, Guoli Fan, Lan Yang, Feng Li\*

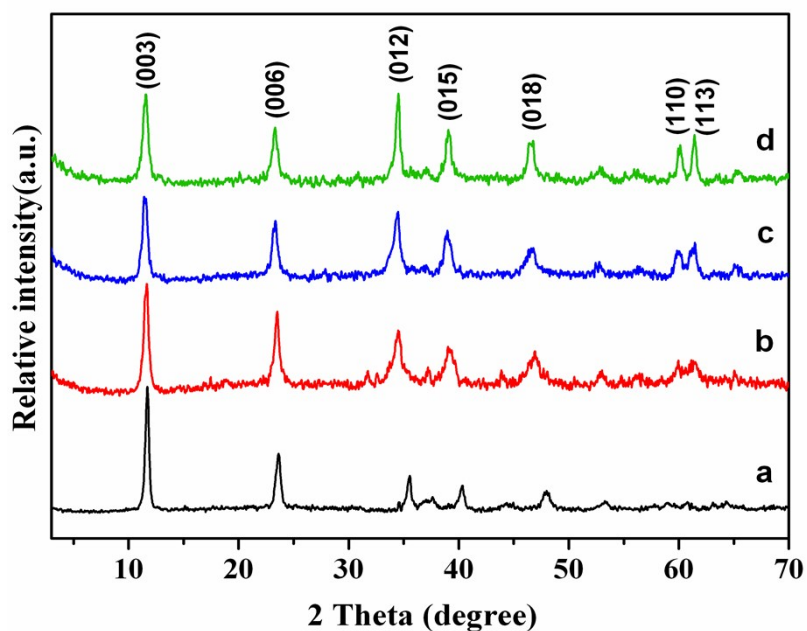

**Fig. S1** XRD patterns of CuZnAl-LDH precursors with different Zn/Al molar ratio of  $x$ : (a)  $x=0$ , (b)  $x=0.5$ , (c)  $x=1.0$  and (d)  $x=1.5$ .

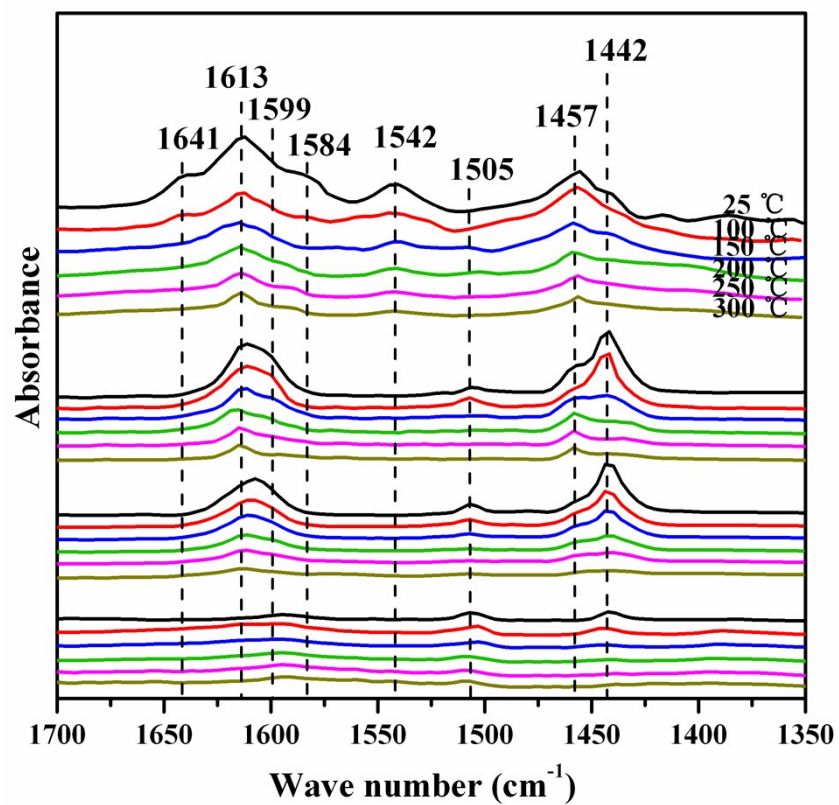

**Fig. S2.** Temperature-dependent Py-IR spectra of CuZn- $x$  samples. (a)  $x=0$ , (b)  $x=0.5$ , (c)  $x=1$ , (d)  $x=1.5$ .

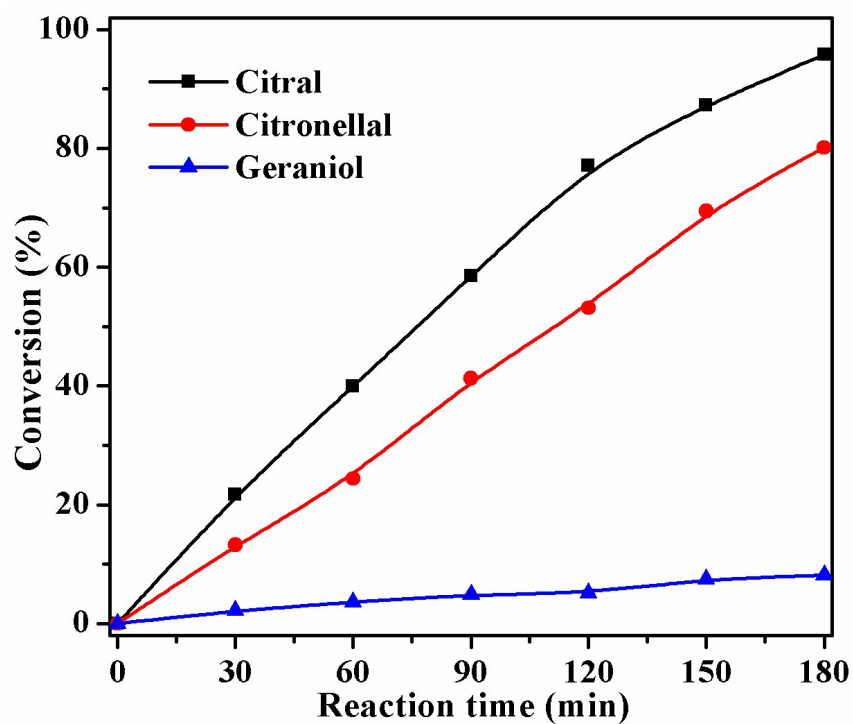

**Fig. S3.** Effect of reaction time on the conversion of citral, citronellal and geraniol during hydrogenation over the CuZn-1 catalyst at 80 °C and 1 MPa H<sub>2</sub>

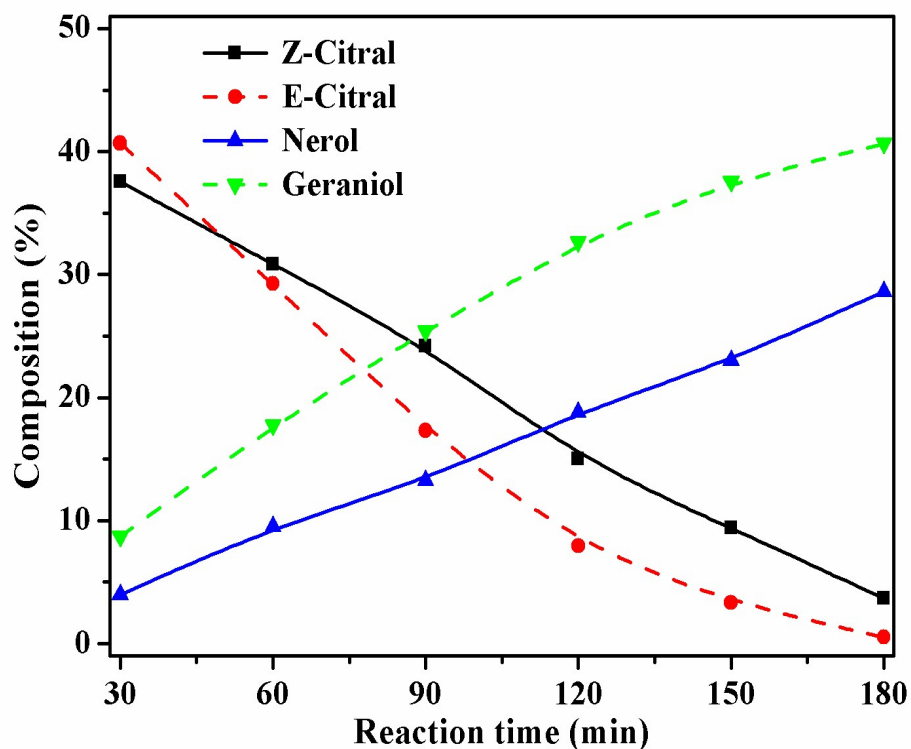

**Fig. S4.** The change in the compositions of citral isomers and allylic alcohol isomers during hydrogenation over the CuZn-1 catalyst at 80 °C and 1 MPa H<sub>2</sub>

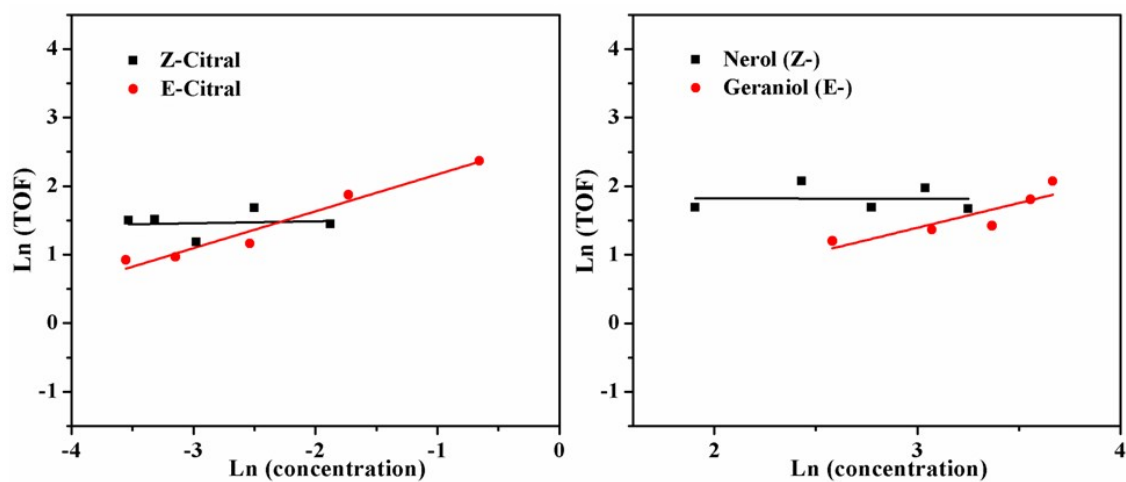

**Fig. S5.** Dependence of the TOF values of citral isomer converted and allylic alcohol isomers formed on the concentration of the respective isomer during hydrogenation over the CuZn-1 catalyst at 80 °C and 1 MPa H<sub>2</sub>.
